# Supplementary material for: Effects of organic solvents on the structures of micellar nanocrystals
Source: Royal Society of Chemistry journal article supplement (doi:10.1039/c6ra28741g), 2017-01-01
Supplement: c6ra28741g1.pdf [file c6ra28741g1.pdf]

## Supplementary data

|               | Solubility for hydrophobic QDs | Solubility for PS-PEG | Boiling point                  | Water miscibility |
|---------------|--------------------------------|-----------------------|--------------------------------|-------------------|
| chloroform    | Soluble                        | Soluble               | 61 °C                          | No                |
| DCM           | Soluble                        | Soluble               | 40 °C                          | No                |
| THF           | Soluble                        | Soluble               | 66 °C                          | Yes               |
| Diethyl ether | Soluble                        | Soluble               | 35 °C                          | No                |
| Acetone       | Insoluble                      | Insoluble             | 56 °C                          | Yes               |
| Acetonitrile  | Insoluble                      | Insoluble             | 82 °C                          | Yes               |
| Hexane        | Soluble                        | Insoluble             | 69 °C                          | No                |
| Ethanol       | Insoluble                      | Insoluble             | 79 °C                          | Yes               |
| Methanol      | Insoluble                      | Insoluble             | 65 °C                          | Yes               |
| Toluene       | Soluble                        | Not tested            | 111 °C<br>(higher than 100 °C) | No                |

**Supplementary Table1.** Selected properties of the organic solvents considered for this work.

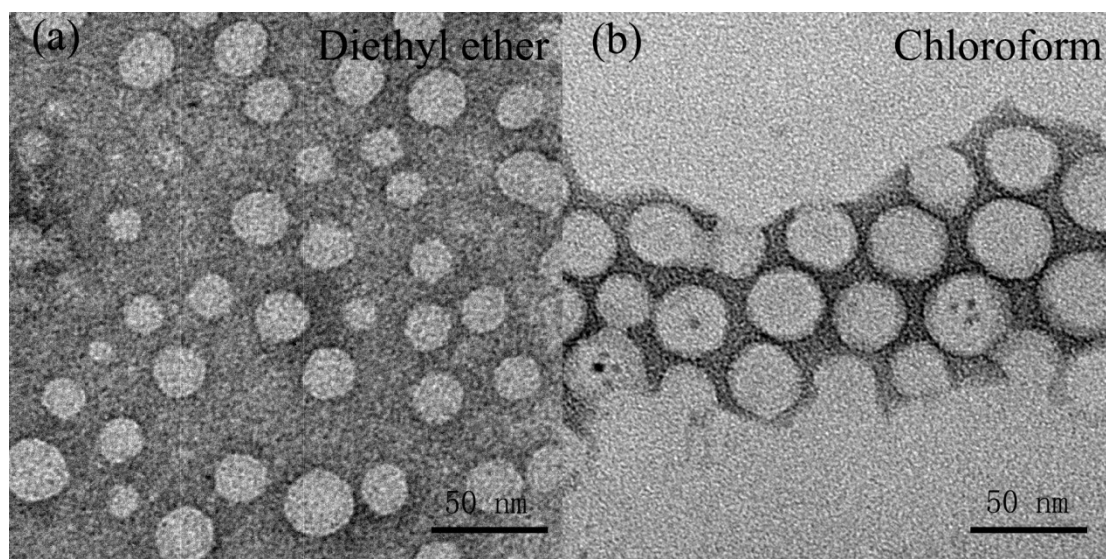

**Supplementary Figure 1.** (a, b) Representative transmission electron microscopy (TEM) images of micelles via diethyl ether and chloroform, respectively. Each of the dark spherical spots (several nanometers in diameter) in the TEM images corresponds to a quantum dot (QD).

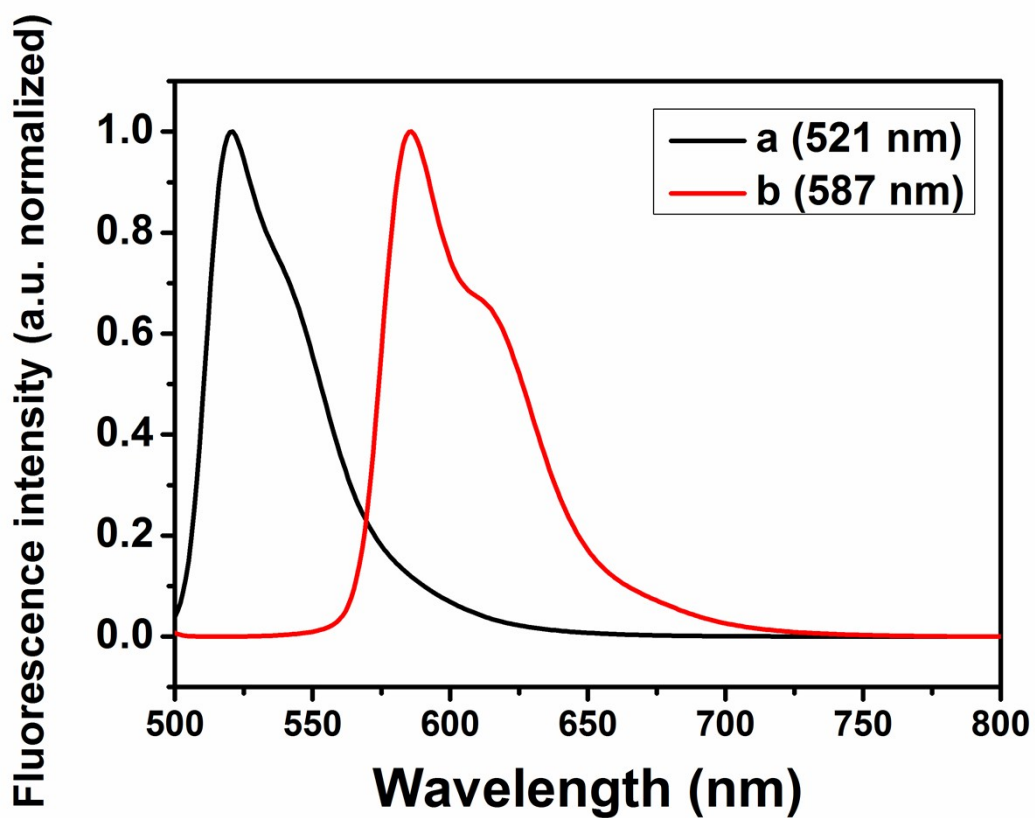

**Supplementary Figure 2.** Fluorescent spectra of the green hydrophobic fluorescent dye (a, emission peak 521 nm) and the orange hydrophobic fluorescent dye (b, emission peak 587 nm) used in the colocalization study. The excitation wavelength used for the measurements was 488 nm.

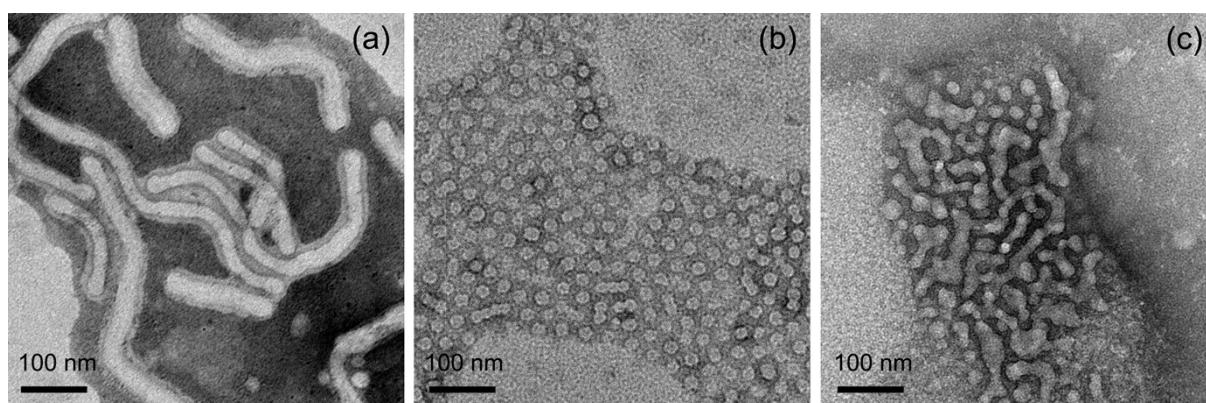

**Supplementary Figure 3.** Empty micelles and dye-encapsulated micelles change shape (from spherical to worm-like shape) over time with THF as the organic solvent. (a) Transmission electron microscopy (TEM) image of empty micelle product with the electrospray time being 60 min. (b) Transmission electron microscopy (TEM) image of the dye-encapsulated micelle product with the electrospray time being 30 min. (c) Transmission electron microscopy (TEM) image of the dye-encapsulated micelle product with the electrospray time being 60 min.

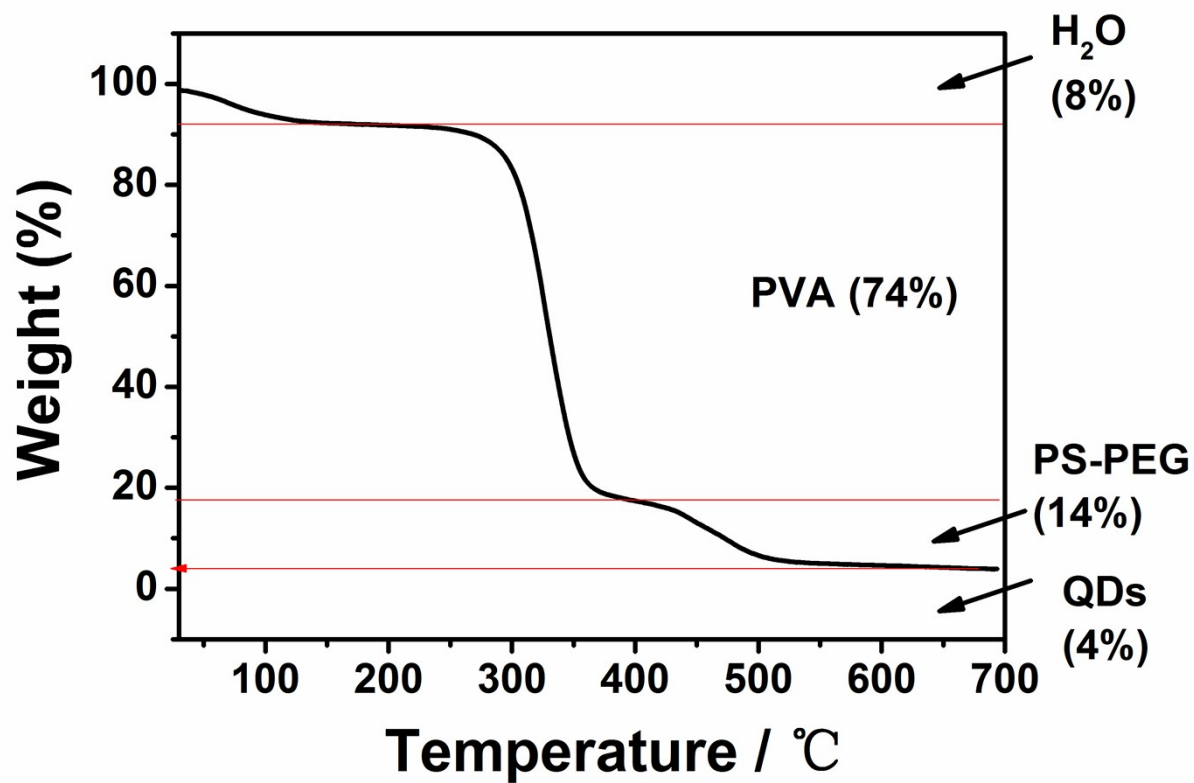

**Supplementary Figure 4.** Thermogravimetric analysis (TGA) of micellar nanocrystals (representative result).

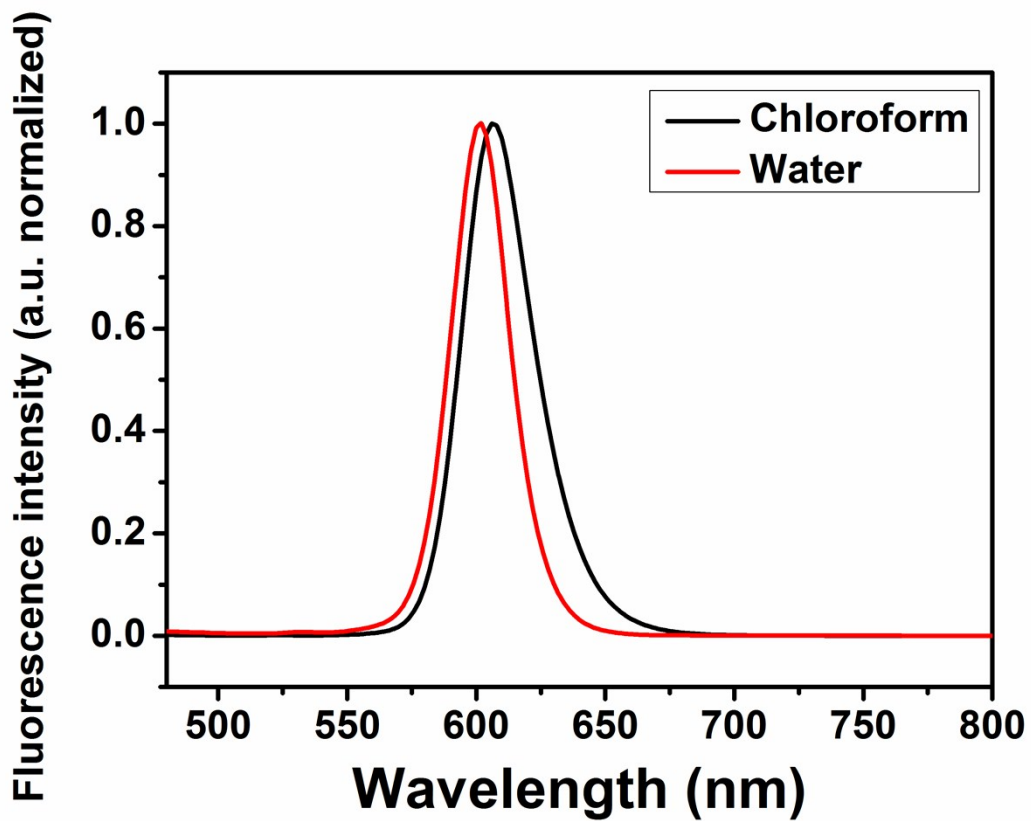

**Supplementary Figure 5.** Fluorescent spectra of micellar nanocrystals (in water, red line) and hydrophobic QDs in chloroform (black line). The concentration of micellar nanocrystals (in water) was typically lower than that of hydrophobic QDs in chloroform; here the height of the fluorescent peak of micellar nanocrystals (in water) was normalized to be the same as that of hydrophobic QDs in chloroform.
